# Supplementary material
Source: Royal Society of Chemistry journal article supplement (doi:10.1039/d6ta01285j)
Supplement: d6ta01285j1.pdf [file d6ta01285j1.pdf]

## Supporting Information

# Spin polarized oxygen evolution reaction in chiral amorphous manganese-doped cobalt oxide: Enhancing electrocatalytic activity via lattice oxygen participation

*Tae Hyung Kim<sup>a</sup>, Hyeon Keun Cho<sup>a</sup>, Seung Hyun Jae<sup>a</sup>, Su Hwan Lee<sup>a</sup>, Jeongu You<sup>b</sup>, Youn Jeong Jang<sup>b</sup>, Bongjun Yeom<sup>b</sup>, Young Moo Lee<sup>a,\*</sup> and Young-Hoon Kim<sup>a,\*</sup>*

<sup>a</sup> Department of Energy Engineering, Hanyang University, 222 Wangsimni-ro, Seongdong-gu, Seoul 04763, Republic of Korea

<sup>b</sup> Department of Chemical Engineering, Hanyang University, 222 Wangsimni-ro, Seongdong-gu, Seoul 04763, Republic of Korea

**\*Corresponding Author:** ymlee@hanyang.ac.kr, younghoonkim@hanyang.ac.kr

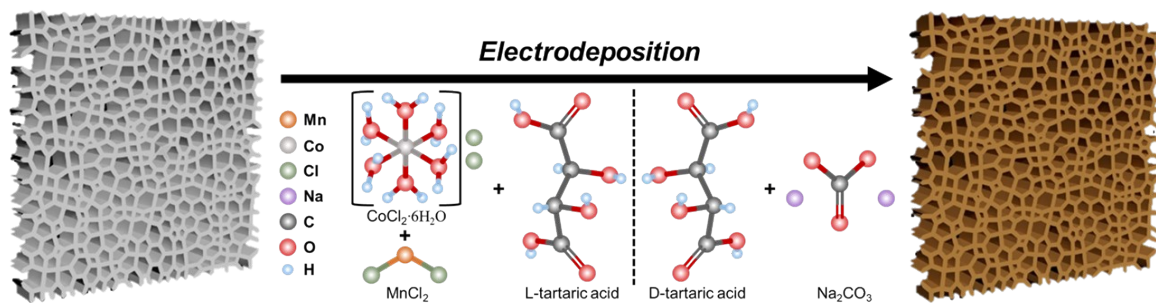

**Fig. S1** Schematic illustration of the direct electrodeposition of chiral amorphous manganese-doped cobalt oxide ( $\text{Mn}:\text{CoO}_x$ ) on Ni foam.

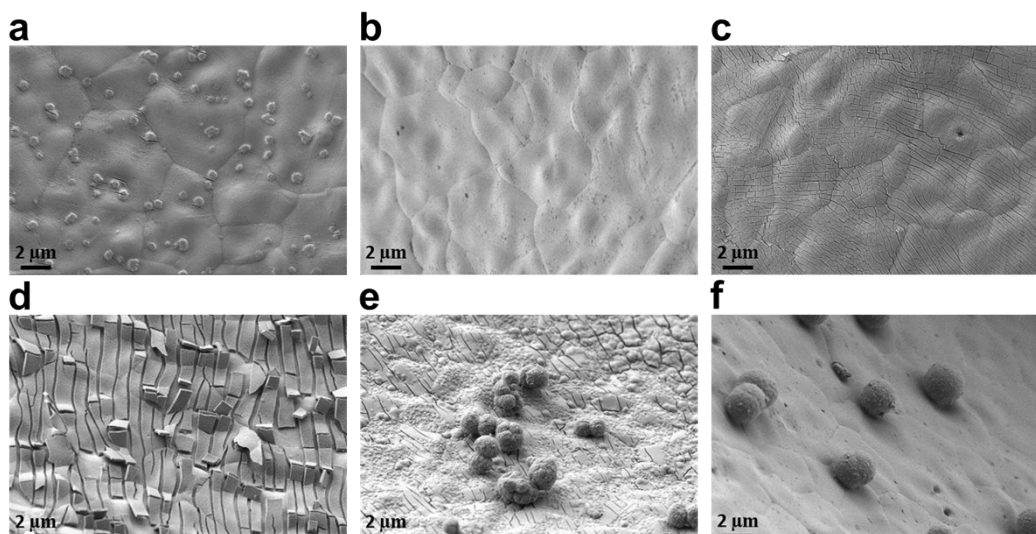

**Fig. S2** Scanning electron microscopy (SEM) images of (a)  $L\text{-CoO}_x$ , (b)  $L\text{-Mn}_{0.2}\text{:Co}_{0.8}\text{O}_x$ , (c)  $L\text{-Mn}_{0.25}\text{:Co}_{0.75}\text{O}_x$ , (d)  $L\text{-Mn}_{0.4}\text{:Co}_{0.6}\text{O}_x$ , (e)  $L\text{-Mn}_{0.6}\text{:Co}_{0.4}\text{O}_x$  and (f)  $L\text{-MnO}_x$ .

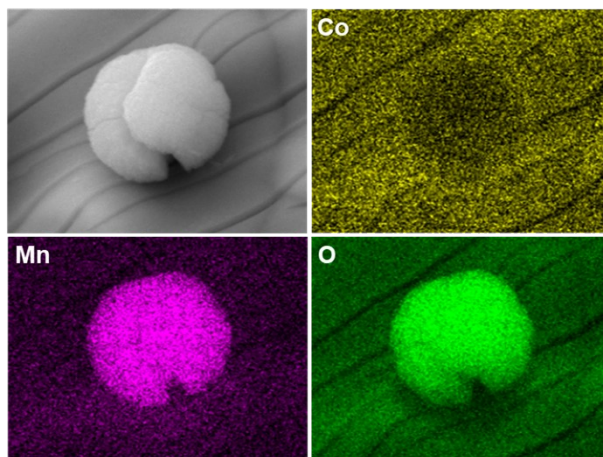

**Fig. S3** SEM image and elemental mapping (Co, Mn and O) of  $L\text{-Mn}_{0.6}\text{:Co}_{0.4}\text{O}_x$ .

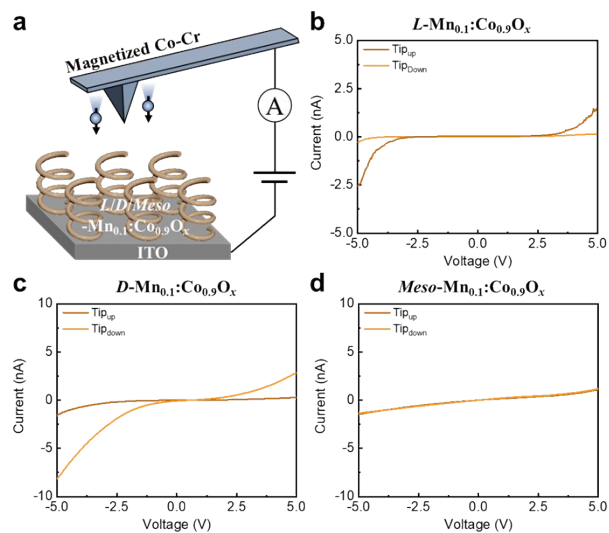

**Fig. S4** (a) Schematic diagram of the magnetic conductive probe atomic force microscopy (mCP-AFM) used for thin film measurements. Spin-polarized average  $I$ - $V$  curves of chiral (b)  $L-Mn_{0.1}:Co_{0.9}O_x$ , (c)  $D-Mn_{0.1}:Co_{0.9}O_x$  and (d) achiral  $meso-Mn_{0.1}:Co_{0.9}O_x$ .

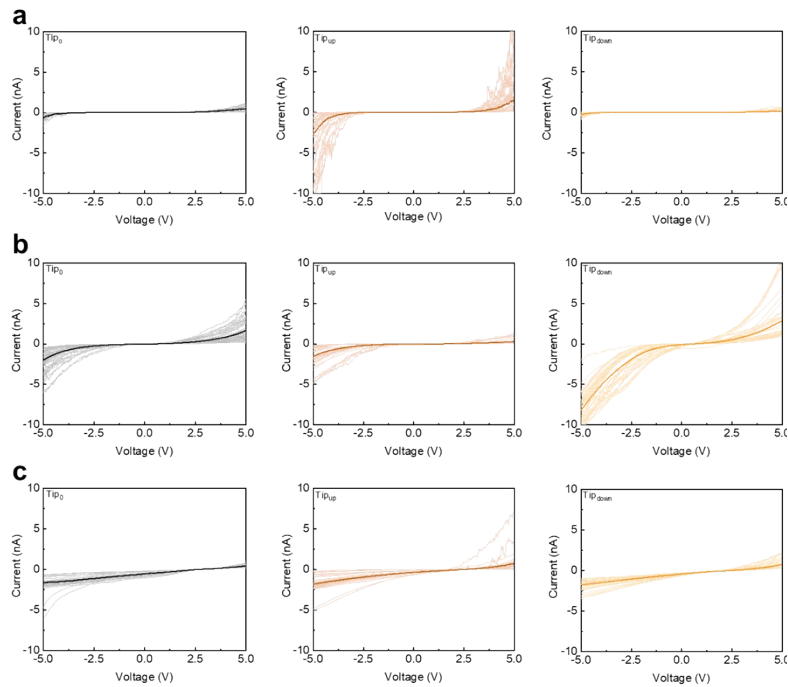

**Fig. S5** Raw and averaged (bold)  $I$ - $V$  curves of chiral (a)  $L$ - $Mn_{0.1}:Co_{0.9}O_x$ , (b)  $D$ - $Mn_{0.1}:Co_{0.9}O_x$  and (c) achiral  $meso$ - $Mn_{0.1}:Co_{0.9}O_x$  thin films, measured using mCP-AFM over a voltage range of -5 V to 5 V. Measurements were conducted with a non-magnetized tip (black), a tip magnetized upward (brown) and a tip magnetized downward (orange).

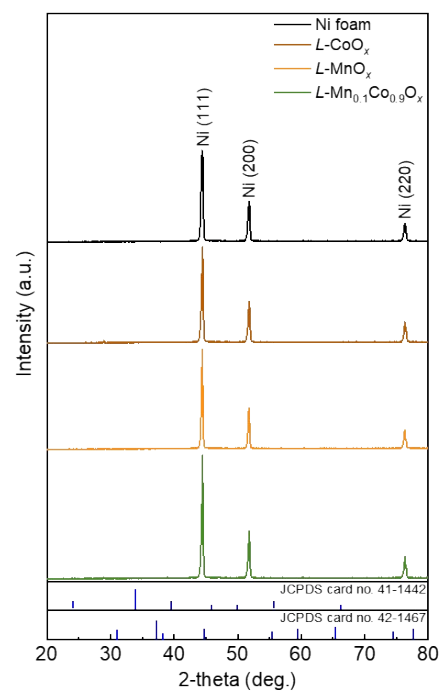

**Fig. S6** XRD peaks of Ni foam,  $L\text{-CoO}_x$  electrodeposited on Ni foam,  $L\text{-MnO}_x$  electrodeposited on Ni foam and  $L\text{-Mn}_{0.1}\text{Co}_{0.9}\text{O}_x$  electrodeposited on Ni foam.

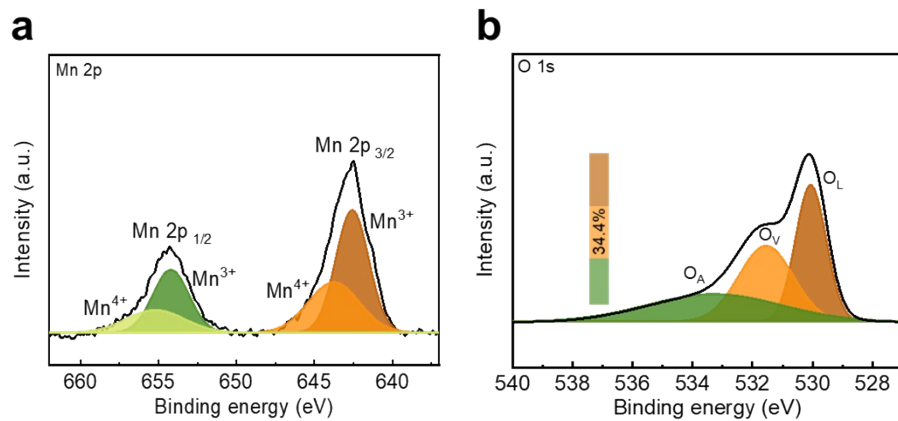

**Fig. S7** X-ray photoelectron spectroscopy (XPS) spectra of  $L\text{-MnO}_x$  thin film (a) Mn 2p and (b) O 1s peaks.

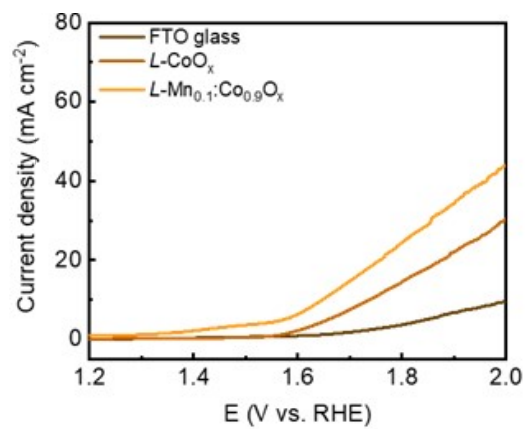

**Fig. S8** LSV curves of bare FTO,  $L\text{-CoO}_x/\text{FTO}$  and  $L\text{-Mn}_{0.1}\text{Co}_{0.9}\text{O}_x/\text{FTO}$  electrodes.

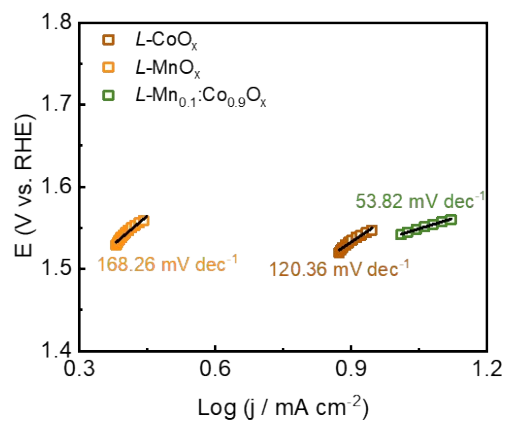

**Fig. S9** Tafel plots of  $L\text{-CoO}_x$ ,  $L\text{-MnO}_x$  and  $L\text{-Mn}_{0.1}\text{:Co}_{0.9}\text{O}_x$  measured 1 M KOH under a half-cell configuration without  $iR$  compensation.

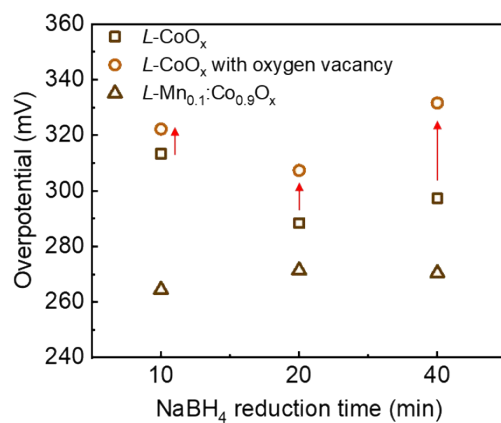

**Fig. S10** Overpotential at 10 mA cm<sup>-2</sup> for pristine and NaBH<sub>4</sub>-reduced *L*-CoO<sub>x</sub> with pristine *L*-Mn<sub>0.1</sub>Co<sub>0.9</sub>O<sub>x</sub> as a function of reduction time in 0.5 M NaBH<sub>4</sub>, measured for independently prepared samples.

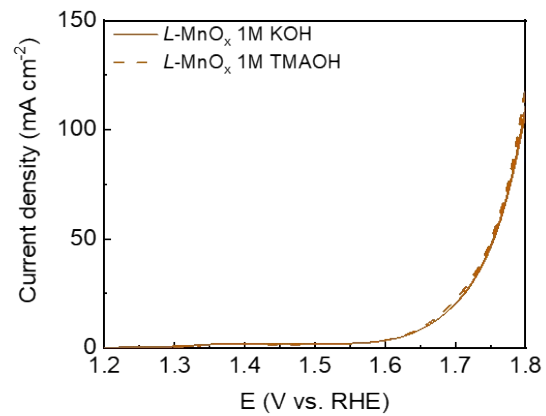

**Fig. S11** LSV curves with 90%  $iR$  compensation of  $L\text{-MnO}_x$  in 1 M tetramethylammonium hydroxide (TMAOH).

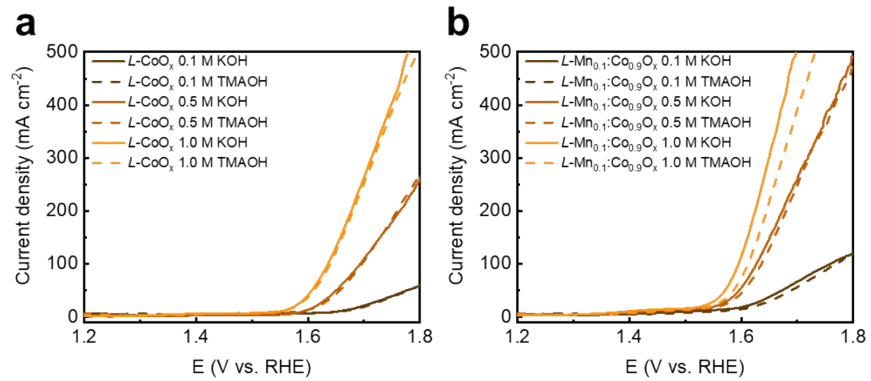

**Fig. S12** LSV curves with 90%  $iR$  compensation of chiral (a)  $L\text{-CoO}_x$  and (b)  $L\text{-Mn}_{0.1}\text{:Co}_{0.9}\text{O}_x$  in KOH and tetramethylammonium hydroxide (TMAOH) at different concentrations of 0.1, 0.5 and 1.0 M.

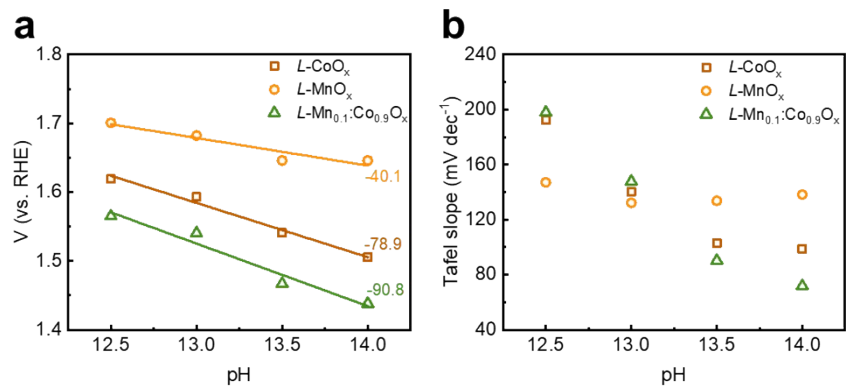

**Fig. S13** (a) pH-dependent onset potential on RHE scale and (b) Tafel slope of  $L\text{-CoO}_x$ ,  $L\text{-MnO}_x$  and  $L\text{-Mn}_{0.1}\text{:Co}_{0.9}\text{O}_x$ .

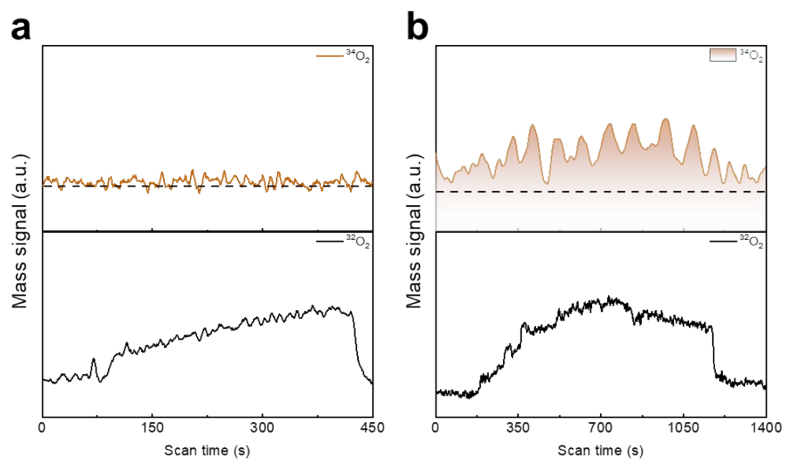

**Fig. S14** DEMS signals corresponding to  $^{34}\text{O}_2$  and  $^{32}\text{O}_2$  evolution during the OER for (a)  $L\text{-CoO}_x$  and (b)  $L\text{-Mn}_{0.1}\text{:Co}_{0.9}\text{O}_x$ .

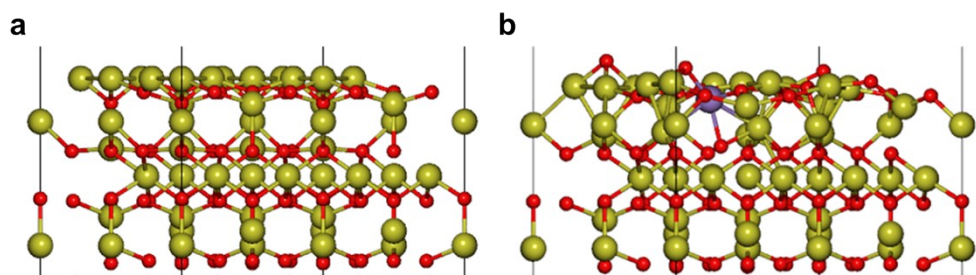

**Fig. S15** Theoretical calculation models of (a)  $L\text{-Co}_3\text{O}_4$  and (b)  $L\text{-Mn:Co}_3\text{O}_4$  slabs.

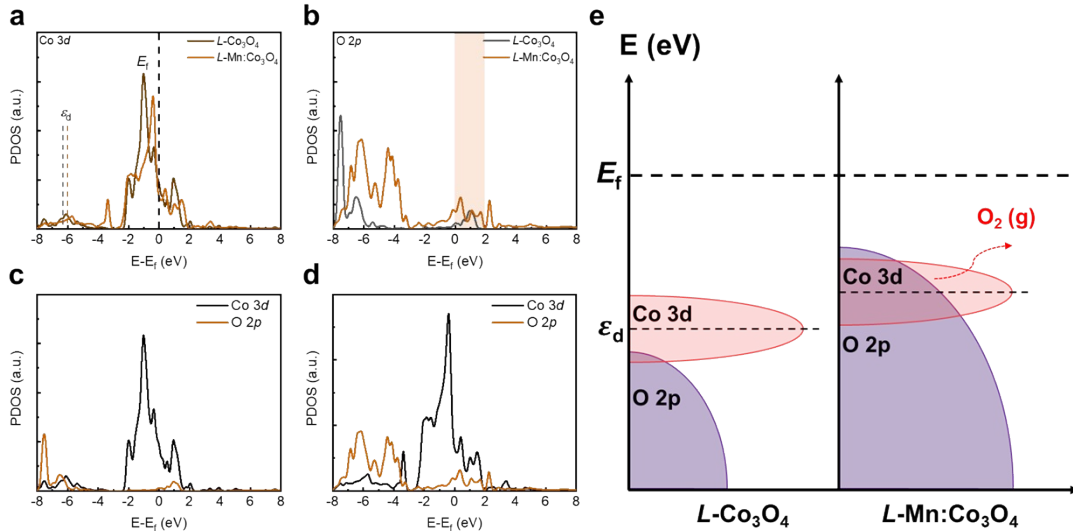

**Fig. S16** DFT calculations of  $L\text{-Co}_3\text{O}_4$  and  $L\text{-Mn:Co}_3\text{O}_4$ . Calculated PDOS of (a) Co  $3d$  and (b) O  $2p$  orbitals. Combined PDOS of Co  $3d$  and O  $2p$  orbitals for (c)  $L\text{-Co}_3\text{O}_4$  and (d)  $L\text{-Mn:Co}_3\text{O}_4$  slabs. (e) Schematic band diagrams of  $L\text{-Co}_3\text{O}_4$  and  $L\text{-Mn:Co}_3\text{O}_4$ .

To further understand the electronic structure modulation induced by Mn incorporation, projected density of states (PDOS) calculations were performed using a representative  $\text{Co}_3\text{O}_4$  (311) slab model with Mn substitution (Fig. S15<sup>†</sup>). As shown in Fig. S16a<sup>†</sup>, Mn incorporation shifts the Co  $d$ -band center ( $\epsilon_d$ ) closer to the Fermi level ( $E_f$ ) from  $-6.31$  eV to  $-5.97$  eV, indicating enhanced hybridization between metal–oxygen interactions. In addition, the O  $2p$  PDOS exhibits an increased population of states near and above the Fermi level after Mn doping (Fig. S16b<sup>†</sup>), which has been associated with enhanced oxygen redox activity and participation of lattice oxygen in catalytic reactions. Moreover, a more pronounced overlap between Co  $3d$  and O  $2p$  orbitals is observed upon Mn incorporation (Fig. S16c, d<sup>†</sup>), suggesting increased metal–oxygen covalency. In particular, increased M–O covalency and the presence of O  $2p$  states near the Fermi level have been strongly correlated with the transition from the AEM to the LOM pathways (Fig. S16e<sup>†</sup>).<sup>28–30</sup> Therefore, these results suggest that Mn doping tunes the electronic structure toward a regime favorable for lattice oxygen participation by enhancing metal–oxygen covalency, increasing the availability of O  $2p$  states near the Fermi level, facilitating oxygen vacancy formation and oxygen ion mobility.

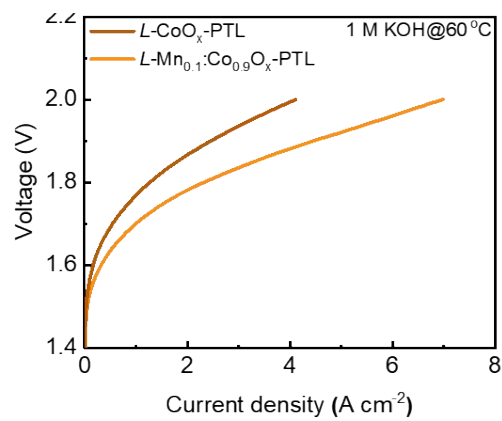

**Fig. S17** Polarization curves of AEMWEs with *L*-CoO<sub>*x*</sub>-PTL and *L*-Mn<sub>0.1</sub>:Co<sub>0.9</sub>O<sub>*x*</sub>-PTL anodes measured in 1 M KOH at 60 °C.

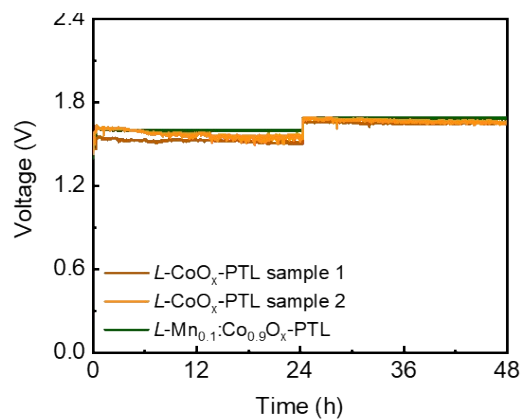

**Fig. S18** Stabilization procedure prior to the durability test, involving current holds at  $0.25 \text{ A cm}^{-2}$  and  $0.5 \text{ A cm}^{-2}$  for 24 hours each, followed by operating at  $1 \text{ A cm}^{-2}$  for single-cell AEMWEs with *L*-CoO<sub>*x*</sub>-PTL sample 1, sample 2 and *L*-Mn<sub>0.1</sub>:Co<sub>0.9</sub>O<sub>*x*</sub>-PTL in 1 M KOH at 60 °C.

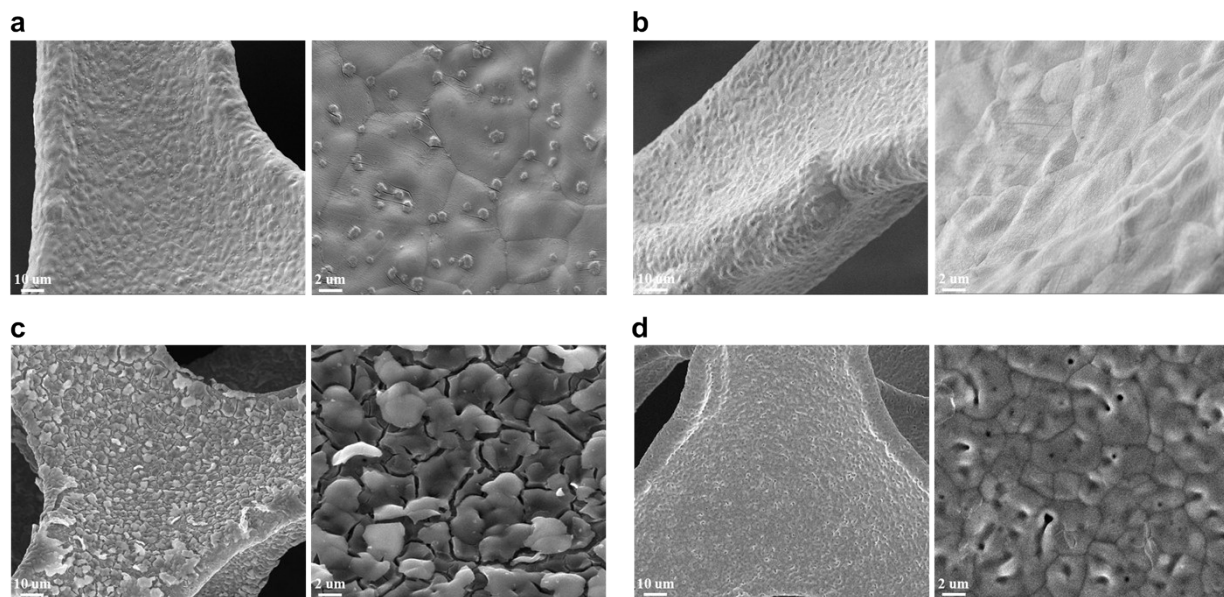

**Fig. S19** SEM images of (a)  $L\text{-CoO}_x$ -porous transport layer (PTL) and (b)  $L\text{-Mn}_{0.1}\text{:Co}_{0.9}\text{O}_x$ -PTL before and (c)  $L\text{-CoO}_x$ -PTL and (d)  $L\text{-Mn}_{0.1}\text{:Co}_{0.9}\text{O}_x$ -PTL after 50 cyclic voltammetry (CV) cycles between 1 and 2 V (vs. RHE).

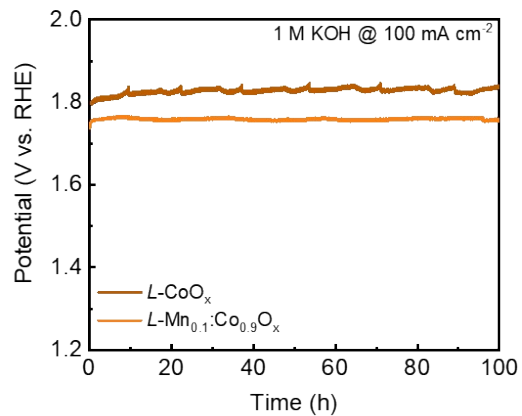

**Fig. S20** Durability tests of  $L\text{-CoO}_x$  and  $L\text{-Mn}_{0.1}\text{:Co}_{0.9}\text{O}_x$  at  $100\text{ mA cm}^{-2}$  for 100 hours in a half-cell configuration.

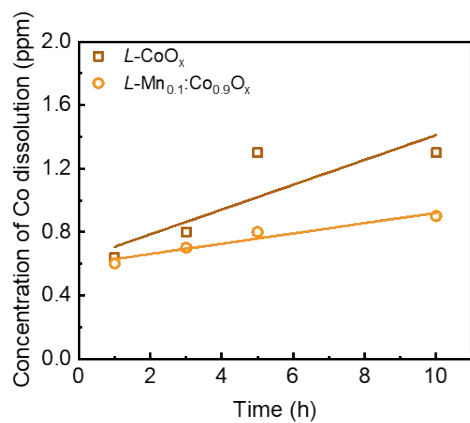

**Fig. S21** Time-dependent Co dissolution during a 10 hour durability test at a constant current density of 500 mA cm<sup>-2</sup> for L-CoO<sub>x</sub> and L-Mn<sub>0.1</sub>:Co<sub>0.9</sub>O<sub>x</sub> in 1 M KOH.

**Table S1.** Summary of Mn fraction (Mn / (Mn + Co)) of chiral Mn:CoO<sub>x</sub> samples determined by SEM-EDS.

| Sample                                                          | Mn (at%) | Co (at%) | Mn / (Mn + Co) (%) |
|-----------------------------------------------------------------|----------|----------|--------------------|
| <i>L</i> -CoO <sub>x</sub>                                      | 73.92    | 0        | 0.00               |
| <i>L</i> -Mn <sub>0.05</sub> :Co <sub>0.95</sub> O <sub>x</sub> | 76.74    | 4.74     | 5.82               |
| <i>L</i> -Mn <sub>0.1</sub> :Co <sub>0.9</sub> O <sub>x</sub>   | 22.1     | 2.09     | 8.64               |
| <i>L</i> -Mn <sub>0.15</sub> :Co <sub>0.85</sub> O <sub>x</sub> | 55.96    | 17.02    | 23.32              |
| <i>L</i> -Mn <sub>0.2</sub> :Co <sub>0.8</sub> O <sub>x</sub>   | 27.83    | 8.59     | 23.59              |
| <i>L</i> -Mn <sub>0.25</sub> :Co <sub>0.75</sub> O <sub>x</sub> | 41.09    | 14.87    | 26.57              |
| <i>L</i> -MnO <sub>x</sub>                                      | 0        | 26.74    | 100.00             |

**Table S2.** Summary of overpotential (10mA cm<sup>-2</sup> without *iR* compensation), double layer capacitance (C<sub>dl</sub>) results for chiral amorphous *L*-Mn:CoO<sub>x</sub>.

| Sample                                                          | Overpotential (mV) | C <sub>dl</sub> (mF cm <sup>-2</sup> ) |
|-----------------------------------------------------------------|--------------------|----------------------------------------|
| <i>L</i> -CoO <sub>x</sub>                                      | 327                | 1.32                                   |
| <i>L</i> -Mn <sub>0.05</sub> :Co <sub>0.95</sub> O <sub>x</sub> | 319                | 1.53                                   |
| <i>L</i> -Mn <sub>0.1</sub> :Co <sub>0.9</sub> O <sub>x</sub>   | 266                | 1.64                                   |
| <i>L</i> -Mn <sub>0.15</sub> :Co <sub>0.85</sub> O <sub>x</sub> | 309                | 1.57                                   |
| <i>L</i> -Mn <sub>0.2</sub> :Co <sub>0.8</sub> O <sub>x</sub>   | 313                | 1.47                                   |
| <i>L</i> -Mn <sub>0.25</sub> :Co <sub>0.75</sub> O <sub>x</sub> | 318                | 1.63                                   |
| <i>L</i> -MnO <sub>x</sub>                                      | 426                | 9.9                                    |

**Table S3.** Summary of the reported properties of PGM-free AEMWEs

| Anode catalyst                                                     | Cathode catalyst | Membrane       | Electrolyte | Operation temperature (°C) | Current density (A cm <sup>-2</sup> at V) | Ref.     |
|--------------------------------------------------------------------|------------------|----------------|-------------|----------------------------|-------------------------------------------|----------|
| CuCo <sub>2</sub> O <sub>4</sub>                                   | Pt/C             | X37-50         | 1 M KOH     | 45                         | 1.4 (1.9)                                 | 4        |
| N-doped CoO                                                        | Pt/C             | piperION A15R  | 1 M KOH     | 60                         | 2 (2.06)                                  | 5        |
| Ru <sub>8%</sub> -Co <sub>3</sub> O <sub>4</sub>                   | Pt/C             | FAA-3-PK-130   | 1 M KOH     | 85                         | 1 (2.06)                                  | 6        |
| Fe@Co                                                              | Pt/C             | X37-50         | 1 M KOH     | 60                         | 2.44 (1.8)                                | 7        |
| Fe-Ni-Co                                                           | PtRu/C           | PSTP-20        | 1 M KOH     | 80                         | 10.7 (2)                                  | 8        |
| Fe-Ni-Co                                                           | PtRu/C           | Patterned PDTP | 1 M KOH     | 80                         | 14.42 (2)                                 | 9        |
| <i>L</i> -Mn <sub>0.1</sub> :Co <sub>0.9</sub> O <sub>x</sub> -PTL | PtRu/C           | PDTP-25        | 1 M KOH     | 80                         | 11.14 (2)                                 | Our work |

## Supplementary References

- 1 P. Ye, K. Fang, H. Wang, Y. Wang, H. Huang, C. Mo, J. Ning and Y. Hu, *Nat. Commun.*, 2024, **15**, 1012.
- 2 F. Wang, X. Xu, Y. Li, L. Gu, L. Li, H. Liu and H. Cong, *Appl. Catal. B Environ. Energy*, 2025, **363**, 124838.
- 3 B. Ge, P. Jiang, C. Huang, B. Chen and X. Qiu, *ACS Sustain. Chem. Eng.*, 2025, **13**, 20569-20579.
- 4 Y. S. Park, M. J. Jang, J. Jeong, S. M. Park, X. Wang, M. H. Seo, S. M. Choi and J. Yang, *ACS Sustainable Chem. Eng.*, 2020, **8**, 2344-2349.
- 5 P.-C. Yu, X.-L. Zhang, T.-Y. Zhang, X.-Y.-N. Tao, T. Y. Yang, Y.-H. Wang, S.-C. Zhang, F.-Y. Gao, Z.-Z. Niu, M.-H. Fan and M.-R. Gao, *J. Am. Chem. Soc.*, 2024, **146**, 20379-20390.
- 6 FY. Zhou, Y. Mao, C. Ye, Z. Wang, S. Wei, J. V. Kennedy, Y. Zhao, H. Yang, B. C. C. Cowie and G. I. N. Waterhouse, *Adv. Energy Mater.*, 2025, 2500700.
- 7 S. Han, J. H. Ryu, W. B. Lee, J. Ryu and J. Yoon, *Small*, 2024, **20**, 2311052.
- 8 C. Hu, H. W. Kang, K. S. Jung, M.-L. Liu, Y. J. Lee, J. H. Park, N. Y. Kang, M.-G. Kim, S. J. Yoo, C. H. Park and Y. M. Lee, *Adv. Sci.*, 2024, **11**, 2306988.
- 9 C. Hu, Y. J. Lee, Y. Ma, X. Zhang, S. W. Jung, H. Hwang, H. K. Cho, M.-G. Kim, S. J. Yoo, Q. Zhang and Y. M. Lee, *ACS Energy Lett.*, 2024, **9**, 1219-1227.
